# Supplementary material for: Lipid Vesicles Loaded with an HIV-1 Fusion Inhibitor Peptide as a Potential Microbicide
Source: PubMed Central journal article supplement (PMC7355883; doi:10.3390/pharmaceutics12060502), 2020-05-31
Supplement: pharmaceutics-12-00502-s001.pdf [file pharmaceutics-12-00502-s001.pdf]

# Supplementary Materials: Lipid Vesicles Loaded with an HIV-1 Fusion Inhibitor Peptide as a Potential Microbicide

Elena Sánchez-López \*, Anna Paús, Ignacio Pérez-Pomeda, Ana Calpena, Isabel Haro and María José Gómara

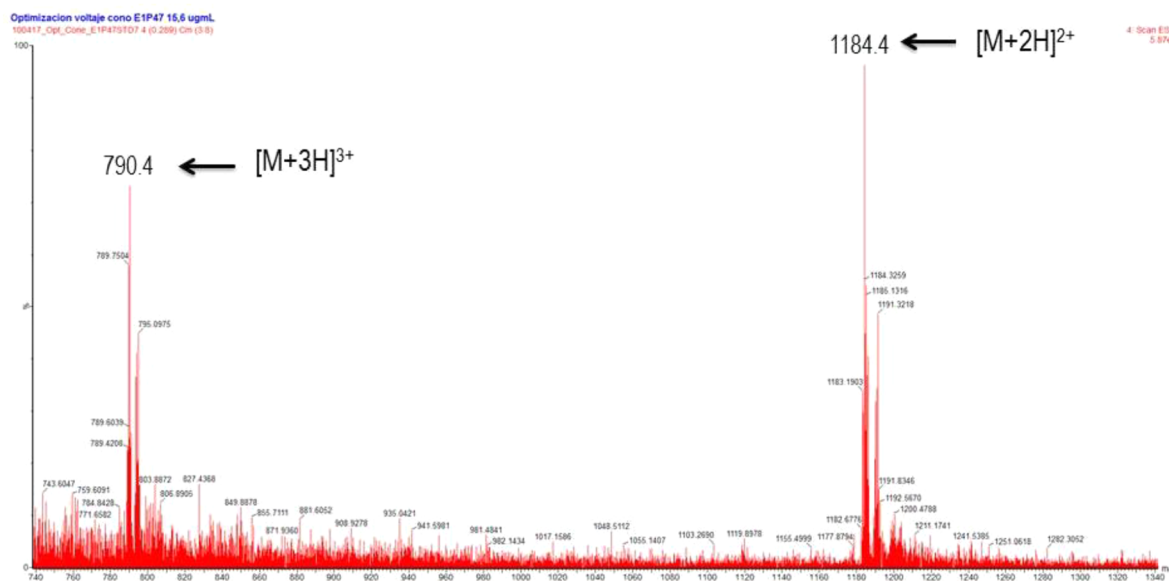

Figure S1. Average mass spectra from E1P47 under ESI at 50 V of cone voltage.

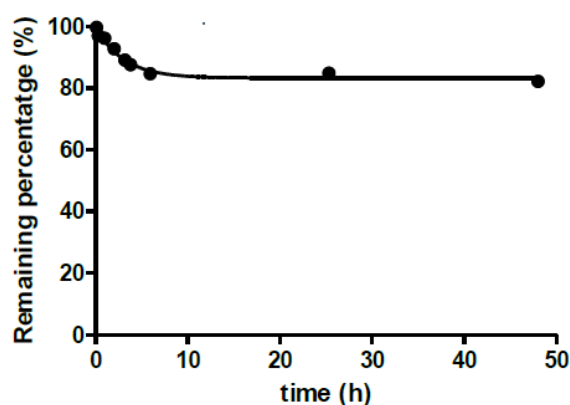

Figure S2. Degradation of E1P47 at 37°C in Transcutol®/H<sub>2</sub>O 1:1 (v/v) for 48 hours.

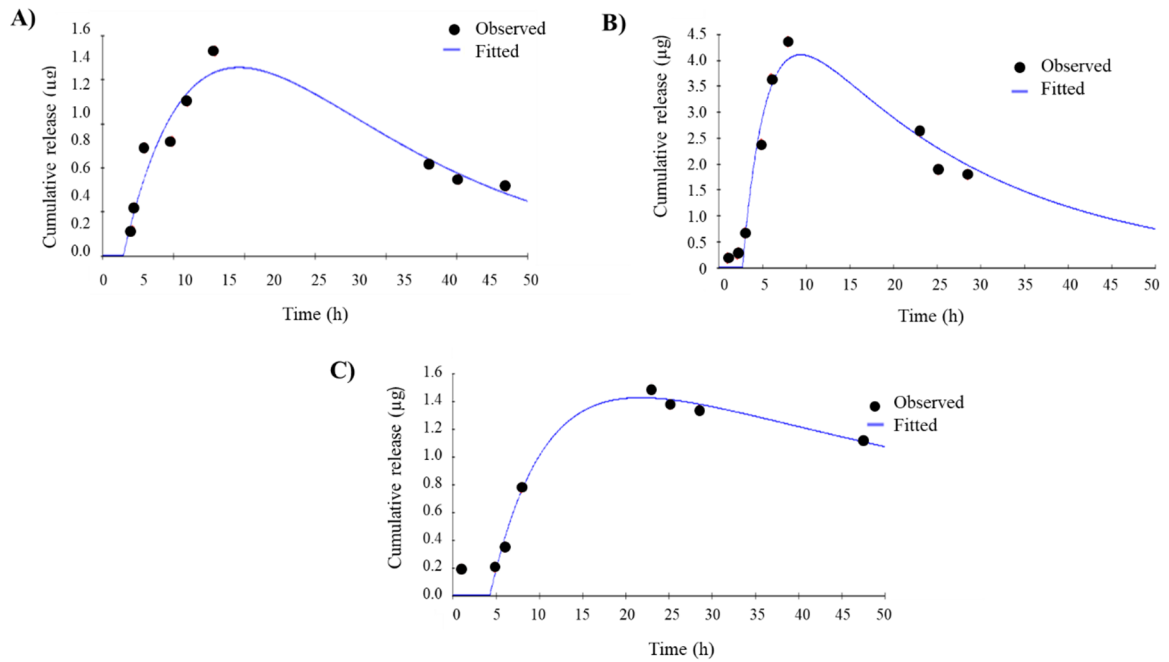

**Figure S3.** Duplicate of the in vitro release profile, measured mass of released peptide (black circles) fitted to a mono-compartmental model (blue lines). 2A) Mono-compartmental fitted model of free E1P47; 2B) Mono-compartmental fitted model of PLGA (E1P47) NPs; 2C) Mono-compartmental fitted model of POPC (E1P47) LUVs drug release.

**Table S1.** Short-term stability of PLGA (E1P47) NPs and POPC (E1P47) LUVs ( $Z_{av}$  and PI values).

| Day | PLGA (E1P47) NPs     |                 | POPC (E1P47) LUVs    |                 |
|-----|----------------------|-----------------|----------------------|-----------------|
|     | $Z_{av} \pm SD$ (nm) | PI $\pm$ SD     | $Z_{av} \pm SD$ (nm) | PI $\pm$ SD     |
| 0   | 245.1 $\pm$ 2.0      | 0.30 $\pm$ 0.00 | 95.1 $\pm$ 2.0       | 0.07 $\pm$ 0.02 |
| 4   | 240. $\pm$ 2.2       | 0.07 $\pm$ 0.05 | 100.1 $\pm$ 1.1      | 0.09 $\pm$ 0.03 |
| 12  | 242.4 $\pm$ 3.1      | 0.09 $\pm$ 0.01 | 97.1 $\pm$ 1.2       | 0.12 $\pm$ 0.02 |
| 40  | 250.0 $\pm$ 10.2     | 0.11 $\pm$ 0.01 | 107.4 $\pm$ 3.0      | 0.10 $\pm$ 0.04 |
